# Supplementary material for: Phase 2 trial of a DNA vaccine (pTVG-HP) and nivolumab in patients with castration-sensitive non-metastatic (M0) prostate cancer
Source: PubMed Central journal article supplement — J Immunother Cancer. 2023 Dec 14;11(12):e008067. doi: 10.1136/jitc-2023-008067 (PMC10729272; doi:10.1136/jitc-2023-008067), 2023-12-14
Supplement: jitc-2023-008067supp001.pdf [file jitc-2023-008067supp001.pdf]

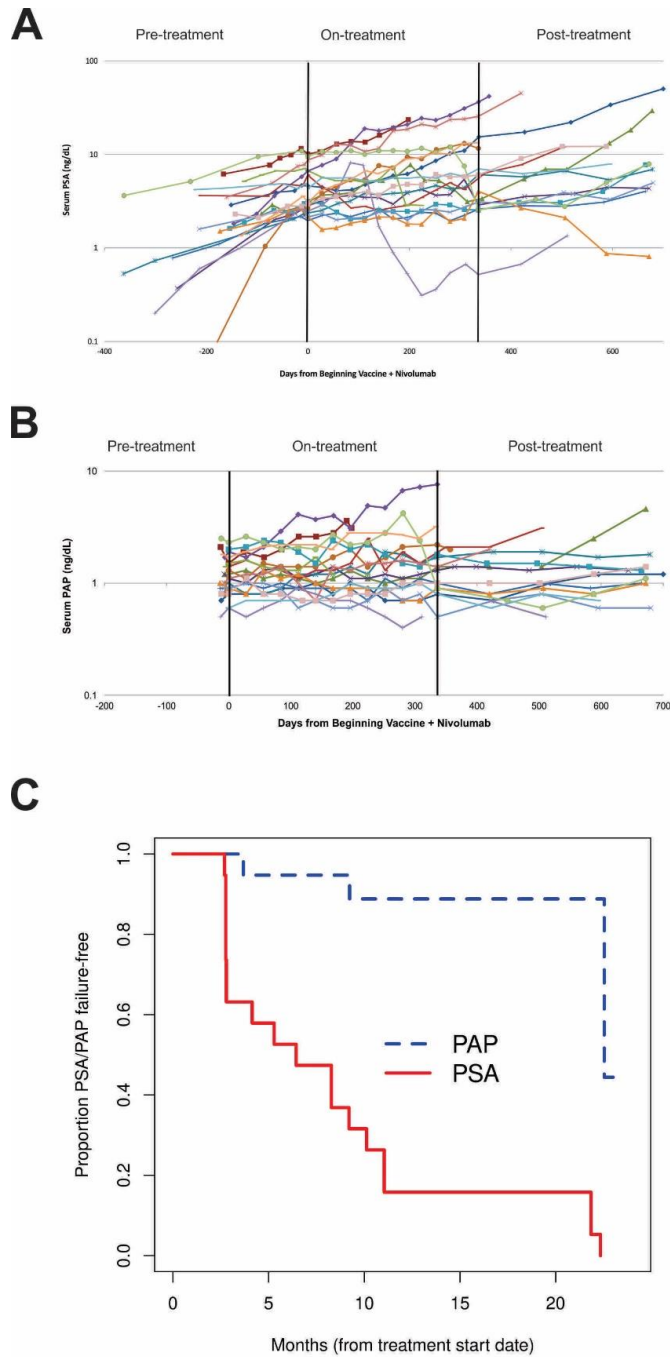

**Supplemental Figure 1: Changes in Serum PSA and PAP.** Serum PSA and PAP values were collected from all individuals prior to treatment (for PSA), over the course of treatment, and in the one-year period off treatment. Shown are absolute values of serum PSA (panel A) or PAP (panel B). Also shown is the time to PSA or PAP progression (panel C).
